# Supplementary material for: Dichlorobis(2-phenylazopyridine)ruthenium(ii) complexes: characterisation, spectroscopic and structural properties of four isomers
Source: Royal Society of Chemistry journal article supplement (doi:10.1039/b313182c), 2004-01-01
Supplement: b313182c.pdf [file b313182c.pdf]

## Supporting Information

---

Dichlorobis(2-phenylazopyridine)ruthenium(II) complexes:  
characterisation, spectroscopic and structural properties of four isomers

---

**Aldrik H. Velders,<sup>a#\*</sup> Karlijn van der Schilden,<sup>a</sup> Anna C.G. Hotze,<sup>a</sup> Jan Reedijk,<sup>a</sup> Huub Kooijman<sup>b</sup>  
and Anthony L. Spek<sup>b</sup>**

<sup>a</sup> *Leiden Institute of Chemistry, Gorlaeus Laboratories, Leiden University, P.O. Box 9502, 2300 RA Leiden, The Netherlands; E-mail: a.velders@chem.leidenuniv.nl*

<sup>b</sup> *Bijvoet Center for Biomolecular Research, Crystal and Structural Chemistry, Utrecht University, Padualaan 8, 3584 CH, Utrecht, The Netherlands*

<sup>#</sup> *Current address: Molteni Farmaceutici, S.S. 67 Loc. Granatieri, I-50018 Scandicci, Florence, Italy. Tel.: +39 055 7361330 Fax: +39 055 7361288; a.velders@moltenifarma.it*

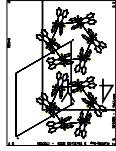

PLATON-Sep 3 15:31:30 2003 - (70703)

RES=0

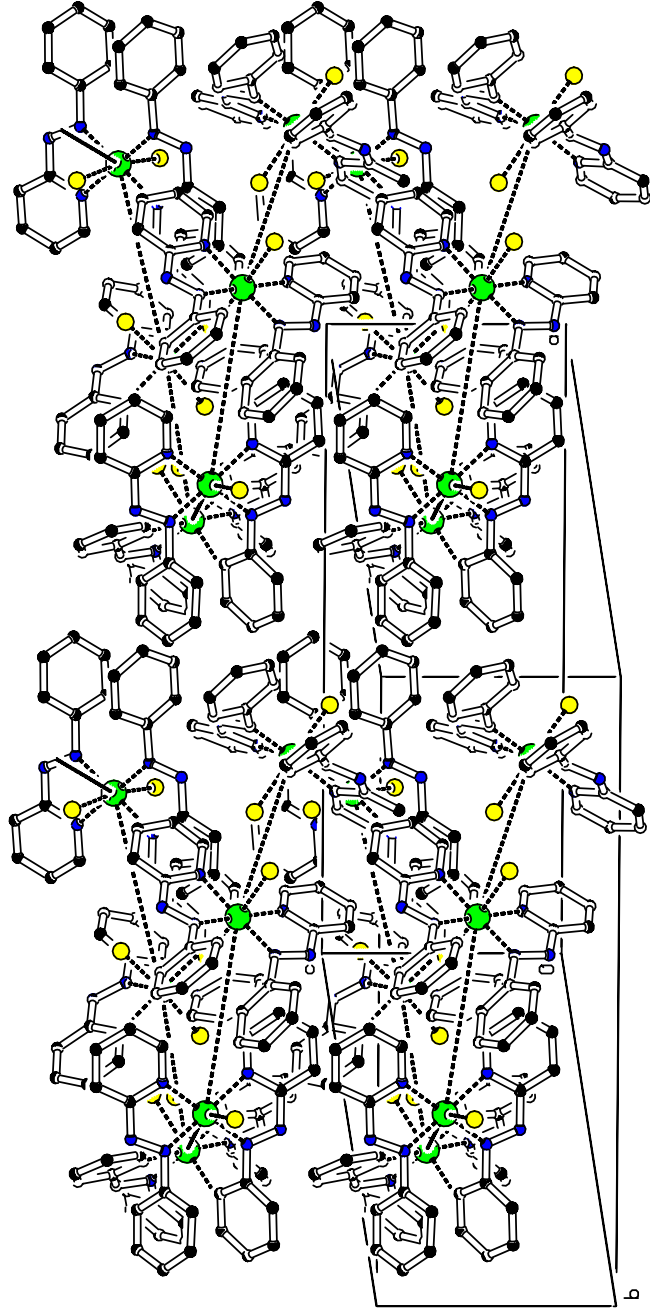

Z 0 S2185A - 2 Helices

96 X

32 Y

PLATON-Sep 3 15:05:37 2003 - (70703)

RES=0

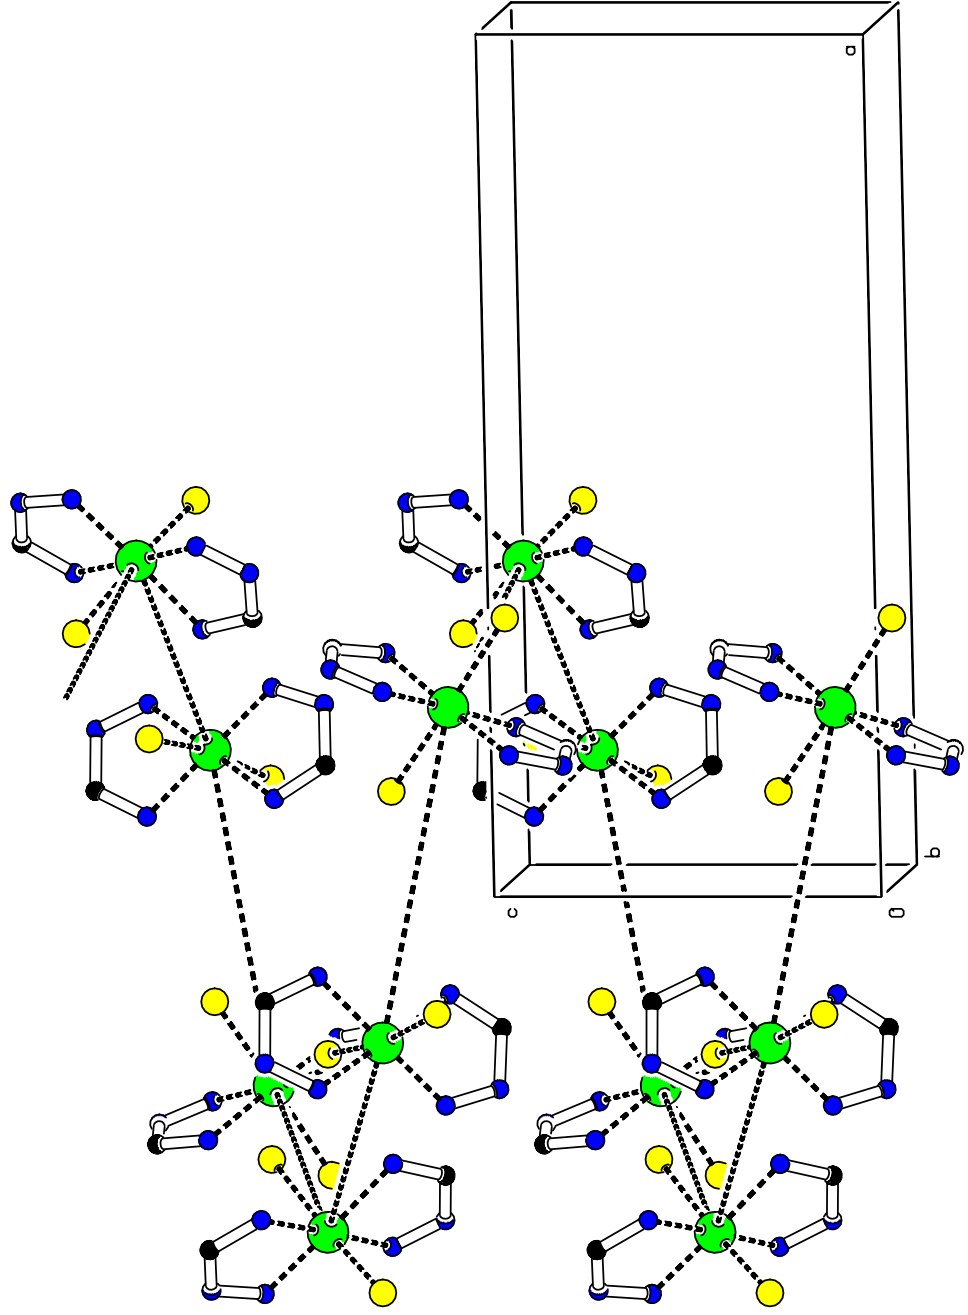

Z -1

S2185A 031299 K-CCD 150K

92 X

0

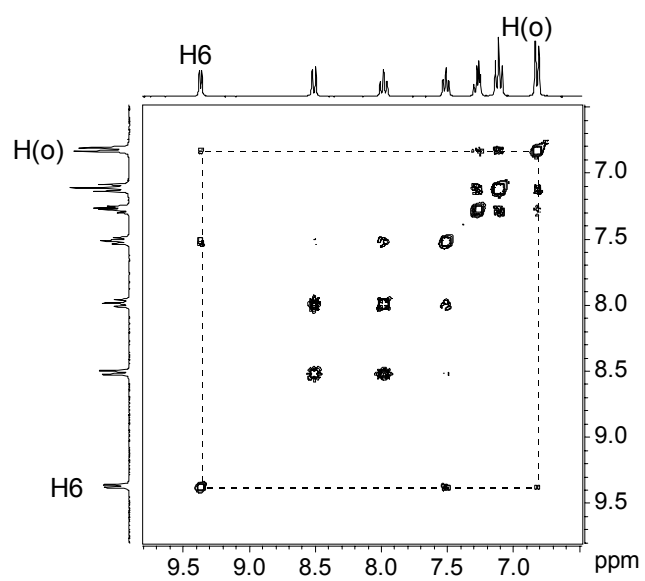

NOESY spectrum of  $\alpha$ -Cl in acetone- $d_6$ . The H6- H(o) NOE cross-peak is indicated with a dashed line.
